# Supplementary material
Source: MDPI journal article supplement (https://www.mdpi.com/2227-9040/10/7/277)
Supplement: s1 [file s1]

# Polypyrrole Film Deposited-TiO<sub>2</sub> Nanorod Arrays for High Performance Ultraviolet Photodetectors

Huan Wang<sup>1</sup>, Pei Qin<sup>2,3</sup>, Yun-Hui Feng<sup>1,\*</sup>, Hui-Liang Sun<sup>1</sup>, Hui-Xiang Wu<sup>1</sup>, Bo-Kai Liao<sup>1</sup>, Yue-Bin Xi<sup>4</sup> and Wei Wang<sup>1,\*</sup>

<sup>1</sup> Guangzhou Key Laboratory of Sensing Materials & Devices, Center for Interdisciplinary Health Management Studies, School of Chemistry and Chemical Engineering, Guangzhou University, Guangzhou 510006, China; cewanghuan@gzhu.edu.cn (H.W.); huiliang@gzhu.edu.cn (H.-L.S.); cce.whx@gzhu.edu.cn (H.-X.W.); bokailiao@gzhu.edu.cn (B.-K.L.)

<sup>2</sup> School of Chemical Engineering and Light Industry, Guangdong University of Technology, Guangzhou 510006, China; qinpei@gz.iscas.ac.cn

<sup>3</sup> Guangzhou Institute of Software Application Technology, No. 1121 Haibin Road, Nansha District, Guangzhou 511400, China

<sup>4</sup> Key Laboratory of Pulp and Paper Science & Technology of Ministry of Education, State Key Laboratory of Biobased Material and Green Papermaking, Qilu University of Technology (Shandong Academy of Sciences), Jinan 250353, China; qlgdxbyb@qlu.edu.cn

\* Correspondence: alleyopp@gzhu.edu.cn (Y.-H.F.); wangw@gzhu.edu.cn (W.W.)

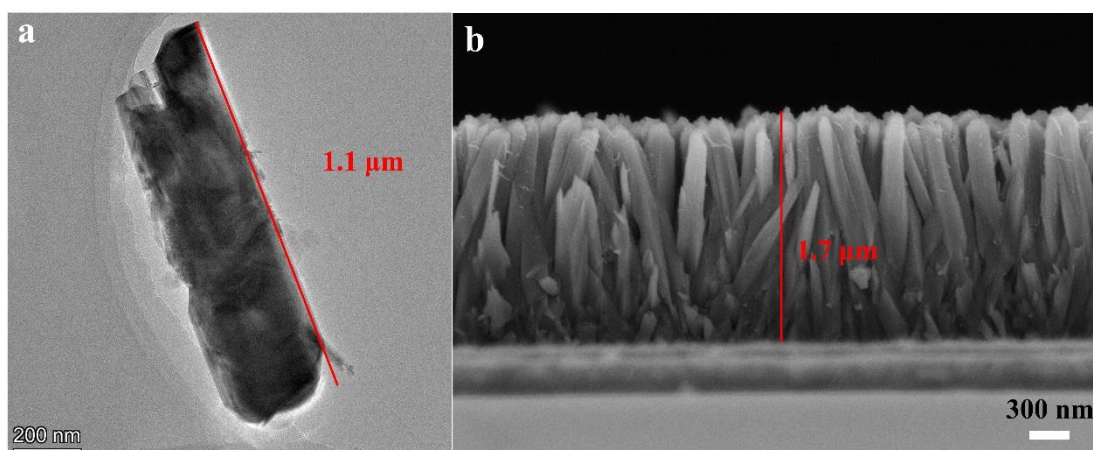

Figure S1. TEM image (a) of TiO<sub>2</sub> and SEM image (b) of TiO<sub>2</sub>-FTO film.

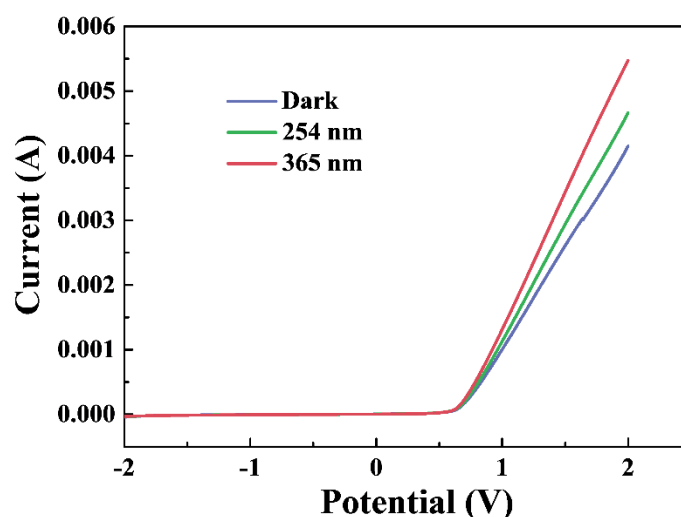

Figure S2. The I-V curves of the FTO-3PPy-TiO<sub>2</sub>-FTO device.

Table S1. The comparison of results between previous reported PDs and our devices.

| Structures                         | Wavelength (nm) | Voltage (V) | I <sub>dark</sub> (nA) | I <sub>pc</sub> (μA)   | Sensitivity | Responsivity (A/W)    | Ref.      |
|------------------------------------|-----------------|-------------|------------------------|------------------------|-------------|-----------------------|-----------|
| TiO <sub>2</sub> -PANI             | 320             | 0           | —                      | $3.2 \times 10^{-2}$   | —           | $3.6 \times 10^{-3}$  | 1         |
| PEDOT-TiO <sub>2</sub>             | 365             | 0           | 0.54                   | $2.07 \times 10^{-3}$  | 3.83        | $8.74 \times 10^{-6}$ | 2         |
| TiO <sub>2</sub> -P3HT             | 350             | 0           | —                      | $2.52 \times 10^{-10}$ | —           | $3.7 \times 10^{-5}$  | 3         |
| SnO <sub>2</sub> -TiO <sub>2</sub> | 365             | 0           | —                      | —                      | —           | 0.15                  | 4         |
| ZnO-TiO <sub>2</sub>               | 365             | 1           | —                      | $5 \times 10^3$        | 388         | $4.5 \times 10^{-6}$  | 5         |
| 3PPy-TiO <sub>2</sub>              | 365             | 0           | 60                     | 2.5                    | 41.7        | $3.5 \times 10^{-3}$  | This work |

## References

1. Zheng, L.; Yu, P.; Hu, K.; Teng, F.; Chen, H.; Fang, X. Scalable-production, self-powered TiO<sub>2</sub> nanowell–organic hybrid UV photodetectors with tunable performances. *ACS Appl. Mater. Interfaces* **2016**, *8*, 33924–33932.
2. Che, Y.; Zhang, H.; Abdiryim, T.; Jamal, R.; Kadir, A.; Helil, Z.; Liu, H. Ultraviolet photodetectors based on TiO<sub>2</sub> nanorod arrays/PEDOT-type conducting polymers. *Opt. Mater.* **2021**, *122*, 111805. <https://doi.org/10.1016/j.optmat.2021.111805>.
3. Zheng, L.; Deng, X.; Wang, Y.; Chen, J.; Fang, X.; Wang, L.; Shi, X.; Zheng, H. Self-powered flexible TiO<sub>2</sub> fibrous photodetectors: Heterojunction with P3HT and boosted responsivity and selectivity by Au nanoparticles. *Adv. Funct. Mater.* **2020**, *30*, 2001604.
4. Chen, D.; Wei, L.; Meng, L.; Wang, D.; Chen, Y.; Tian, Y.; Yan, S.; Mei, L.; Jiao, J. High-performance self-powered UV detector based on SnO<sub>2</sub>-TiO<sub>2</sub> nanomace arrays. *Nanoscale Res. Lett.* **2018**, *13*, 92.
5. Zhou, M.; Wu, B.; Zhang, X.; Cao, S.; Ma, P.; Wang, K.; Fan, Z.; Su, M. Preparation and UV photoelectric properties of aligned ZnO–TiO<sub>2</sub> and TiO<sub>2</sub>–ZnO core–shell structured heterojunction nanotubes. *ACS Appl. Mater. Interfaces* **2020**, *12*, 38490–38498.
